# Supplementary material for: Imported Amoebic Liver Abscess in France
Source: PLoS Negl Trop Dis. 2013 Aug 8;7(8):e2333. doi: 10.1371/journal.pntd.0002333 (PMC3738465; doi:10.1371/journal.pntd.0002333)
Supplement: Table S2 — Factors associated with percutaneous aspiration. Multivariate analysis for 88 patients (missing data in 2 cases) ° : patients born and living in France who travelled to tropical areas. °° : patients born in France living in an endemic region. °°° : patients born in an endemic region and living in France who traveled back to their country to visit friends and relatives. °°°° :patients born in an endemic region and living in France who did not return to their country since they immigrated. * : White Blood Cells, ** C-Reactive Protein. (XLS) [file pntd.0002333.s002.xls]

## Sheet: Feuil1
		N	n with percutaneous aspiration (%)		Unadjusted OR [95% CI]		p	Adjusted OR [95% CI]		p
Sex	women	20	5	(25)	1		0.53
	men	68	22	(32)	1.43	[0.46 - 4.45]
Age (years)	≤ 41	43	14	(33)	1		0.71
	> 41	45	13	(29)	0.84	[0.34 - 2.08]
Absces size	≤ 69 mm	42	11	(27)	1		0.28
	> 69 mm	46	16	(35)	1.67	[0.66 - 4.21]
Origin	European travelers°	29	9	(31)	1		0.44
	European Expatriates°°	8	1	(13)	0.31	[0.03 - 2.97]
	VFR°°°°	16	5	(31)	1.01	[0.27 - 3.77]
	Immigrants°°°	20	9	(45)	1.81	[0.55 - 5.92]
	unknown	15	3	(20)	0.55	[0.12 - 2.46]
Abdominal pain	no	16	4	(25)	1		0.59
	yes	72	23	(32)	1.41	[0.41 - 4.84]
Cytolysis	no	78	23	(29)	1		0.36
	yes	10	4	(40	1.91	[0.47 - 7.77]
WBC* count (per mm3)	≤ 10 000	13	2	(15)	1		0.09
	> 10 000	60	17	(28)	2.17	[0.43 - 10.85]
	unknown	15	8	(53)	6.28	[1.02 - 38.65]
Anemia	no	34	11	(32)	1		0.91
	yes	25	8	(32)	0.98	[0.33 - 2.97]
	unknown	29	8	(28)	0.79	[0.27 - 2.36]
CRP **	≤ 200	20	5	(25)	1		0.70
	>200	58	18	(31)	1.35	[0.42 - 4.28]
	unknown	10	4	(40)	2.00	[0.40 - 10.10]
Localisation	lefft liver	17	7	(41)	1		0.58
	right liver	61	17	(28)	0.55	[0.18 - 1.68]
	unknown	10	3	(30)	0.61	[0.12 - 3.22]
Number of abscesses	1	67	24	(36)	1		0.54
	2	8	2	(25)	0.73	[0.13 - 4.07]
	3	7	1	(14)	0.30	[0.03 - 2.69]
	≥ 4	6	0	(0)	.	.
Department of admission	Medical	65	13	(20)	1		0.001	1		0.002
	Surgical	14	10	(71)	10.00	[2.70 - 37.03]		17.76	[3.43 - 91.86]
	unknown	9	4	(44)	3.20	[0.75 - 13.62]		3.05	[0.65 - 14.32]
Lag time between return to Europe and onset	≤ 128 days	25	10	(40)	1		0.19
	> 128 days	24	9	(38)	0.90	[0.28 - 2.84]
	unknown	39	8	(21)	0.39	[0.13 - 1.18]
